# Supplementary material
Source: PubMed Central journal article supplement (PMC2336898)

SUPPLEMENTARY FIGURE S1

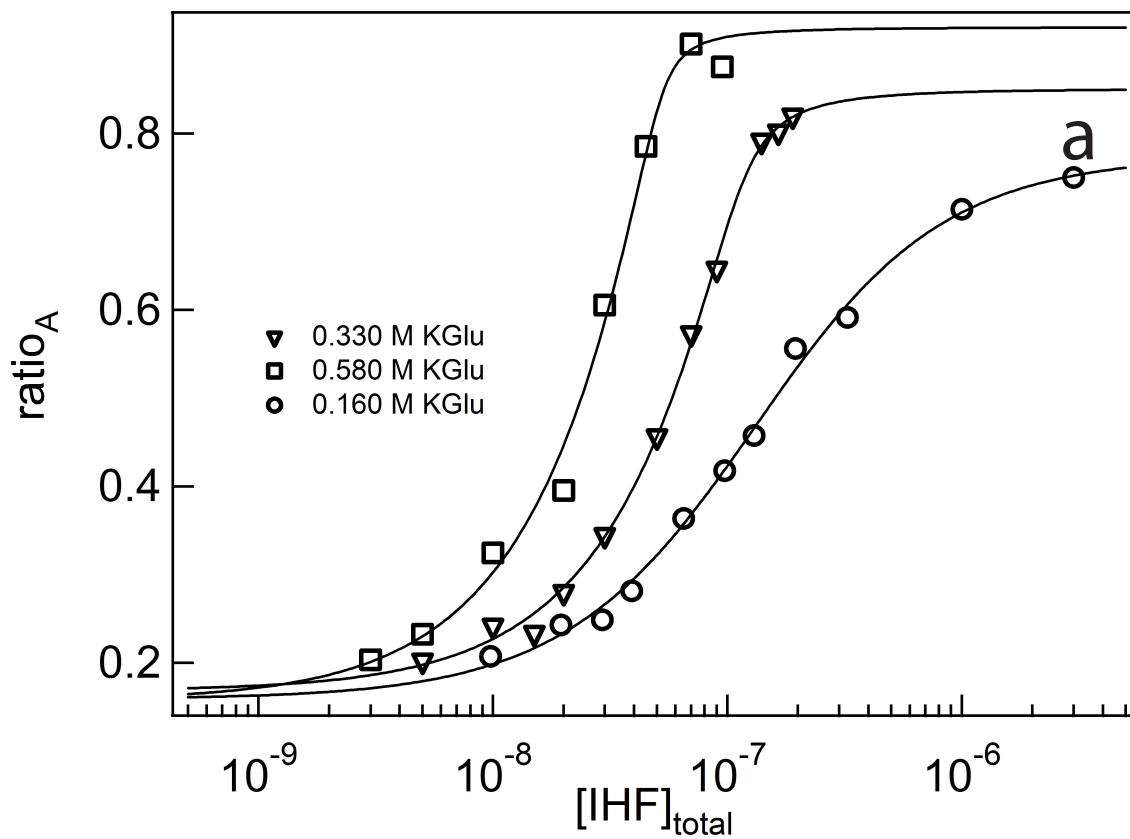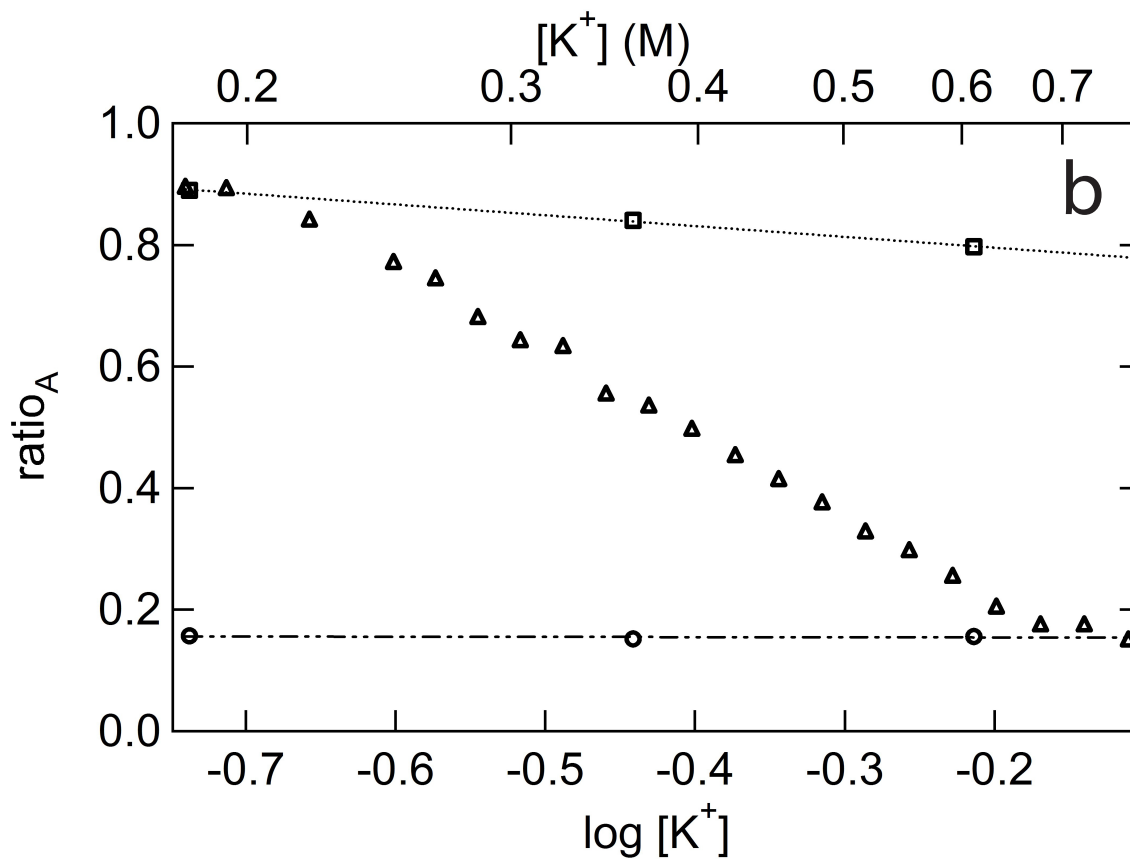

Supplement: NIHMS42713-supplement-01.pdf [file NIHMS42713-supplement-01.pdf]

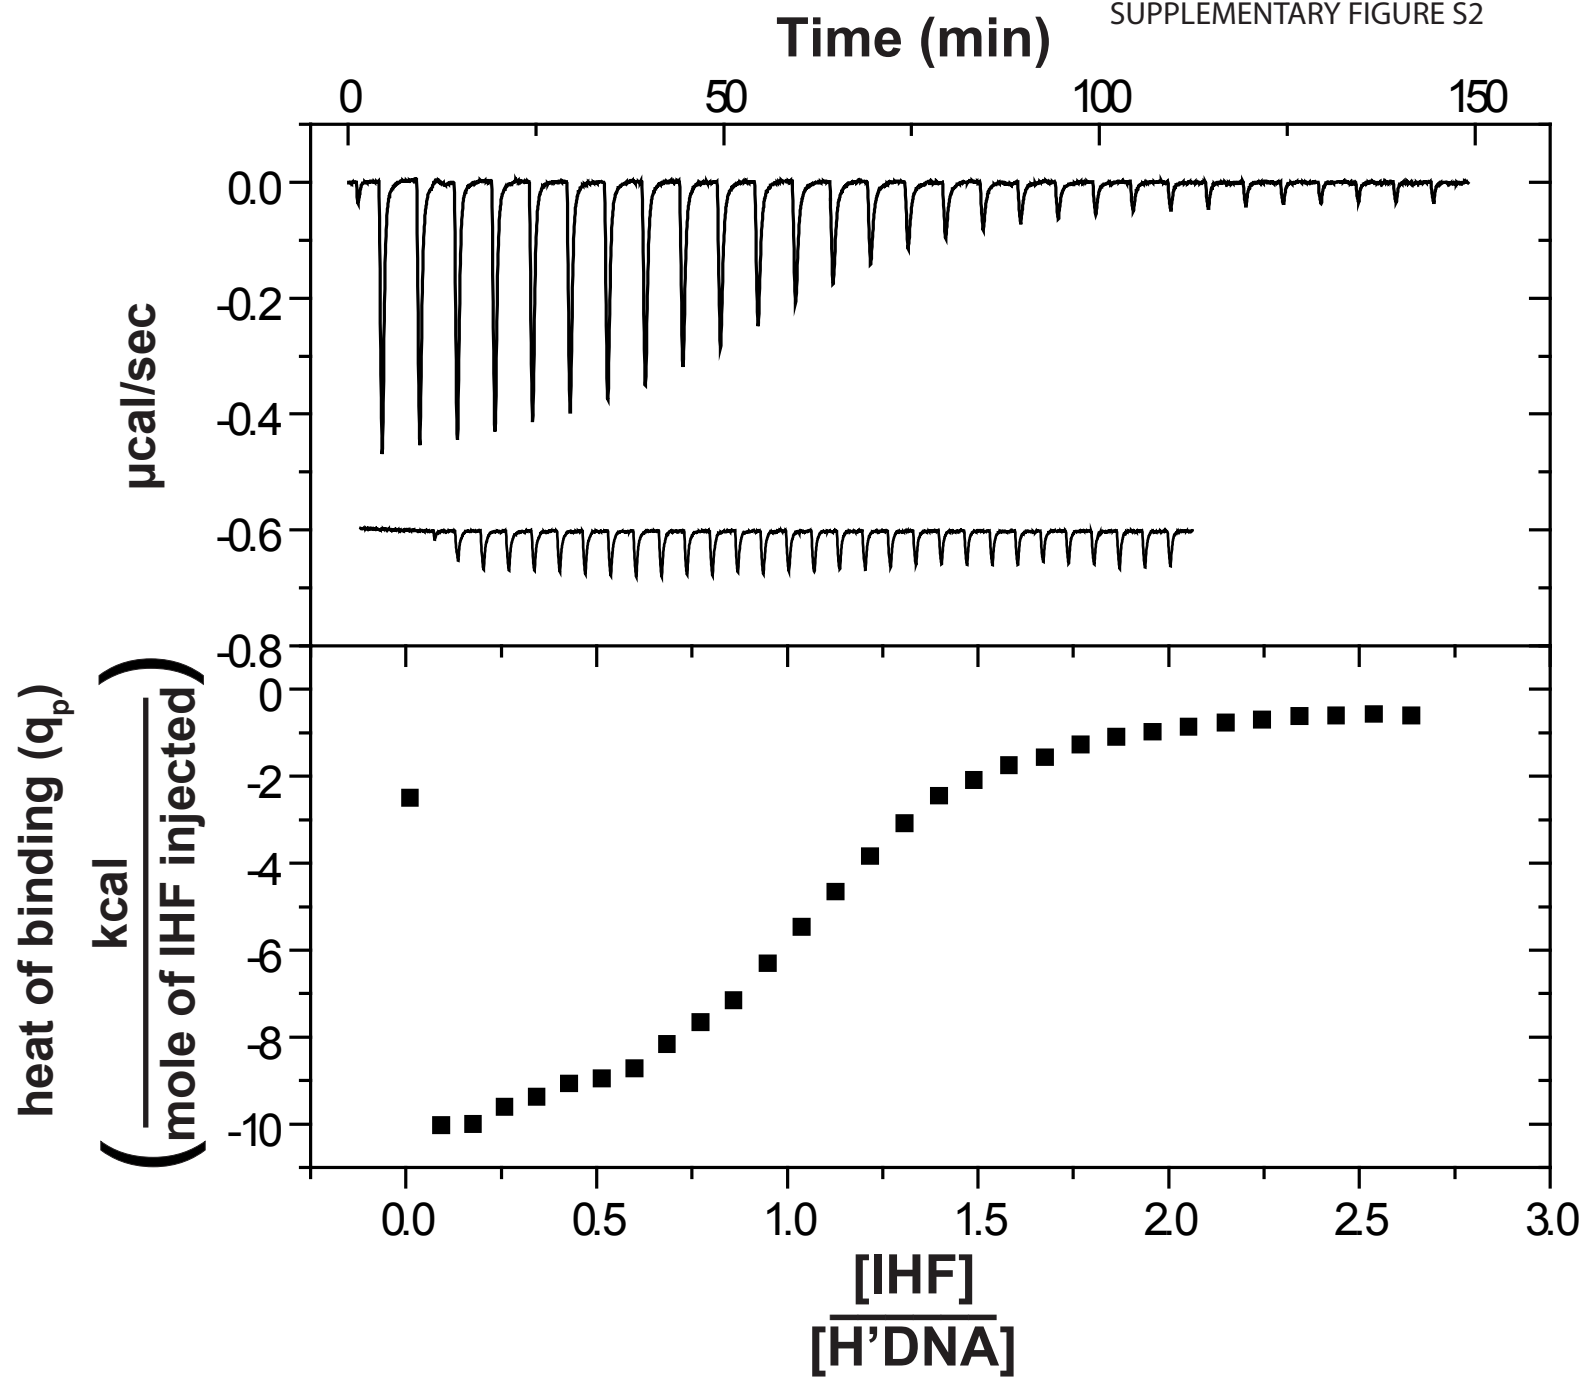

Supplement: NIHMS42713-supplement-02.pdf [file NIHMS42713-supplement-02.pdf]

SUPPLEMENTARY FIGURE S3

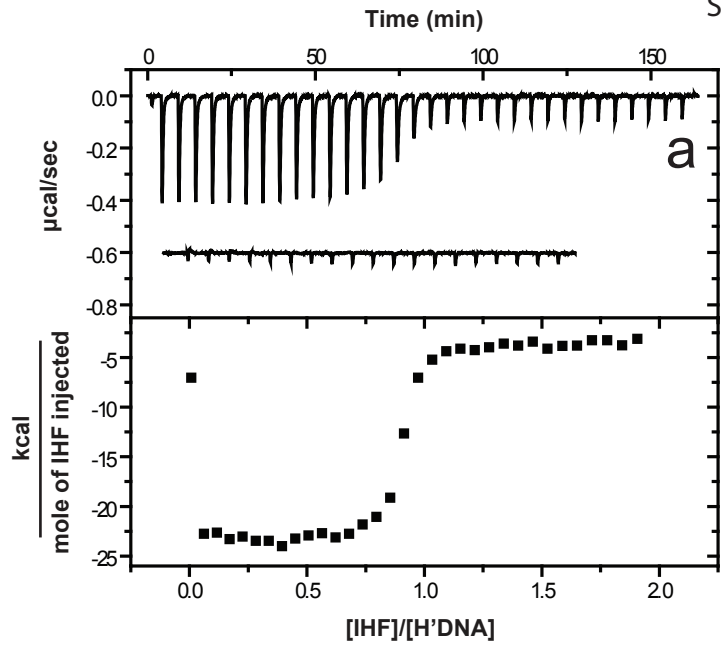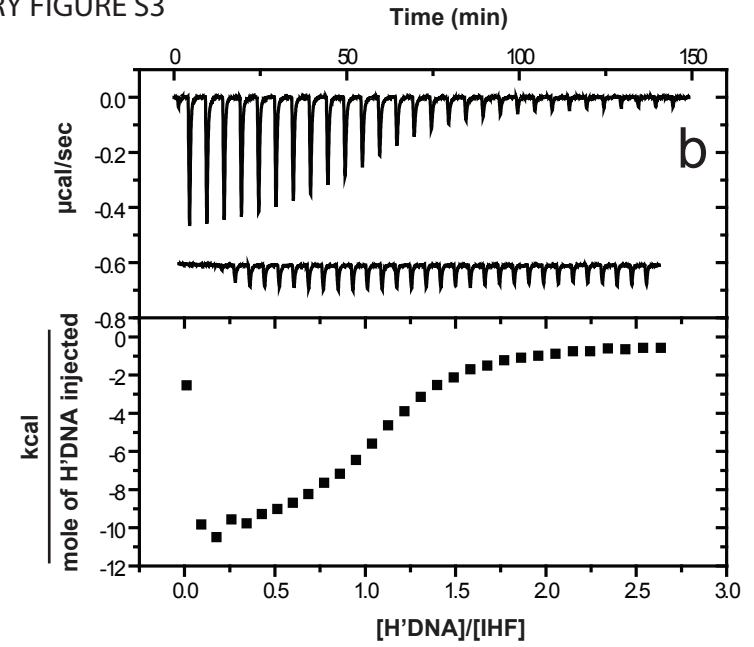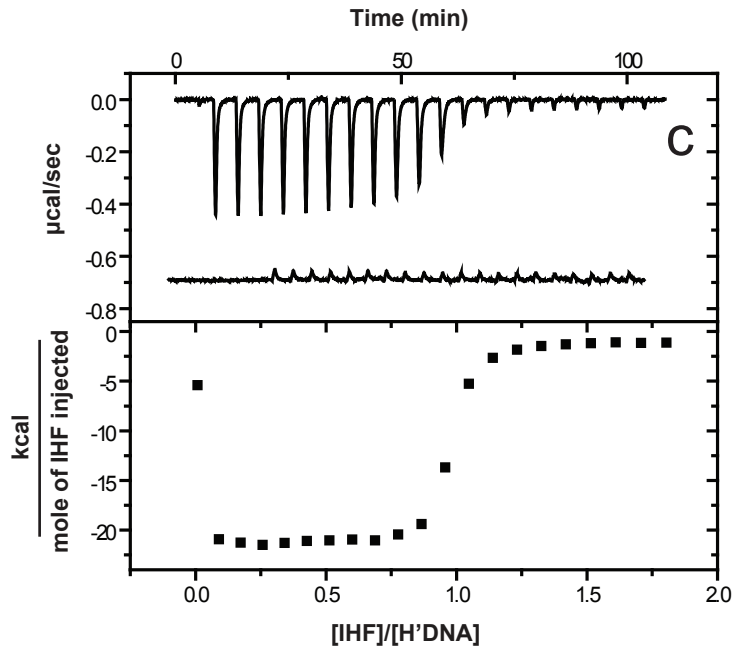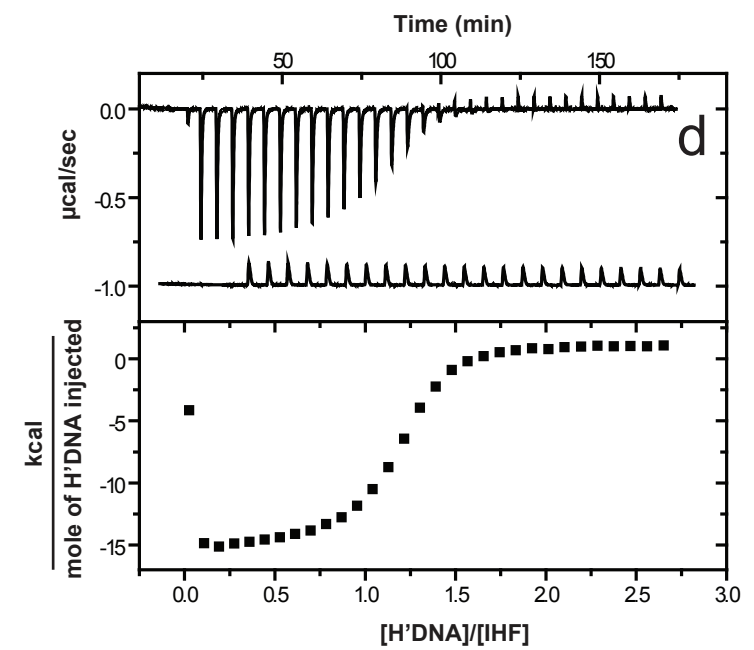

Supplement: NIHMS42713-supplement-03.pdf [file NIHMS42713-supplement-03.pdf]
